# Supplementary material for: The effect of minimal dietary changes with raisins in NAFLD patients with non-significant fibrosis: a randomized controlled intervention
Source: Royal Society of Chemistry journal article supplement (doi:10.1039/c6fo01040g), 2016-01-01
Supplement: c6fo01040g1.pdf [file c6fo01040g1.pdf]

**Table 1S. Differences in anthropometrics, BP, US, EUS and NFS within Currant and Control arm of NAFLD patients who regulated their BW and completed the 24-wk trial**

| Variable                 | Arm     | Week 0       | Week 24      | P value | *P value |
|--------------------------|---------|--------------|--------------|---------|----------|
| BW (kg)                  | Control | 80.6±14.0    | 76.7±13.2    | <0.001  | 0.391    |
|                          | Currant | 82.3±12.7    | 79.4±11.5    | <0.001  |          |
| BMR (Kcal/24h)           | Control | 1620.5±299.1 | 1577.8±284.9 | 0.002   | 0.633    |
|                          | Currant | 1616.8±341.3 | 1588.5±331.1 | 0.042   |          |
| BMI (kg/m <sup>2</sup> ) | Control | 28.5±4.1     | 27.1±3.7     | <0.001  | 0.508    |
|                          | Currant | 29.0±3.8     | 28.1±3.8     | <0.001  |          |
| Fat (%)                  | Control | 32.3±7.8     | 30.2±8.7     | 0.005   | 0.039    |
|                          | Currant | 34.8±7.2     | 33.4±8.5     | 0.009   |          |
| Trunk fat (%)            | Control | 31.3±7.0     | 29.2±8.2     | 0.020   | 0.053    |
|                          | Currant | 33.2±5.5     | 32.0±6.4     | 0.063   |          |
| WC (cm)                  | Control | 97.4±11.5    | 94.5±12.8    | 0.035   | 0.549    |
|                          | Currant | 99.3±11.0    | 96.9±11.0    | 0.015   |          |
| HC (m)                   | Control | 107.7±10.3   | 105.5±9.9    | 0.003   | 0.955    |
|                          | Currant | 111.0±8.1    | 107.6±6.8    | 0.001   |          |
| WHR                      | Control | 0.90±0.08    | 0.9±0.08     | 0.448   | 0.691    |
|                          | Currant | 0.9±0.09     | 0.9±0.09     | 1.000   |          |
| SBP (mmHg)               | Control | 131.8±14.0   | 121.7±11.5   | 0.001   | 0.364    |
|                          | Currant | 127.2±14.0   | 123.1±11.9   | 0.097   |          |
| DBP (mmHg)               | Control | 82.7±9.1     | 76.2±8.7     | <0.001  | 0.025    |
|                          | Currant | 78.7±8.5     | 77.5±8.9     | 0.380   |          |
| HF (bpm)                 | Control | 67.5±10.3    | 67.0±8.7     | 0.788   | 0.327    |

|           |         |          |          |                    |                    |
|-----------|---------|----------|----------|--------------------|--------------------|
|           | Currant | 69.4±6.8 | 67.4±6.8 | 0.209              |                    |
| US (Hz)   | Control | 1.6±0.4  | 1.4±0.4  | 0.034 <sup>#</sup> | 0.250 <sup>#</sup> |
|           | Currant | 2.0±4.2  | 1.8±0.9  | 0.014 <sup>#</sup> |                    |
| EUS (kPa) | Control | 5.6±1.7  | 4.9±0.8  | 0.059              | 0.377              |
|           | Currant | 5.2±0.9  | 4.7±0.9  | 0.013              |                    |
| NFS       | Control | -2.1±1.2 | -1.9±1.2 | 0.041              | 0.104              |
|           | Currant | -2.2±0.9 | -2.1±0.9 | 0.185              |                    |

Data are mean values ± standard deviation (SD).

BW, body weight; BMR, basic metabolic rate; BMI, body mass index; WC, waist circumference; HC, hip circumference; WHR, waist to hip ratio; SBP, systolic blood pressure; DBP, diastolic blood pressure; HF, heart frequency; US, ultrasound; EUS, elastography ultrasound stiffness; NFS, NAFLD Fibrosis Score

P values: comparison with the baseline values by the paired samples t test # or the Wilcoxon test, Difference was considered significant at  $P < 0.05$ .

\* P values indicate significant differences in change of risk factors in the raisin group as compared with the change in the control group, applying the independent samples t test # or the Mann-Whitney test, Difference was considered significant at  $P < 0.05$ .

**Table 2S. Differences in biochemical, inflammatory and oxidative stress indices within Currant and Control arm of NAFLD patients who regulated their BW and completed the 24-wk trial**

| Variable        | Arm     | Week 0      | Week 24    | P value            | * P value          |
|-----------------|---------|-------------|------------|--------------------|--------------------|
| Glucose (mg/dL) | Control | 92.5±18.5   | 92.5±18.5  | 1.000              | 0.005              |
|                 | Currant | 94.6±9.3    | 86.4±9.3   | <0.001             |                    |
| TC (mg/dL)      | Control | 202.7±35.0  | 209.7±37.1 | 0.306              | 0.735              |
|                 | Currant | 209.5±34.3  | 210.6±33.1 | 0.713              |                    |
| HDL-C (mg/dL)   | Control | 56.9±13.8   | 52.7±13.6  | 0.038              | 0.818              |
|                 | Currant | 55.9±14.0   | 52.8±15.3  | 0.187              |                    |
| LDL-C (mg/dL)   | Control | 121.4±33.0  | 137.2±34.2 | 0.011              | 0.437              |
|                 | Currant | 122.3±39.3  | 130.1±37.2 | 0.171              |                    |
| TG (mg/dL)      | Control | 107.1±45.7  | 99.5±42.4  | 0.394 <sup>#</sup> | 0.624              |
|                 | Currant | 150.4±106.0 | 141.9±86.1 | 0.356 <sup>#</sup> |                    |
| SGOT (U/L)      | Control | 23.7±6.6    | 21.4±6.6   | 0.183              | 0.542              |
|                 | Currant | 22.4±5.9    | 22.3±7.2   | 0.942              |                    |
| SGPT (U/L)      | Control | 29.2±14.8   | 23.9±12.0  | 0.209 <sup>#</sup> | 0.456 <sup>#</sup> |
|                 | Currant | 28.4±14.0   | 25.9±12.3  | 0.541 <sup>#</sup> |                    |
| SGOT/SGPT       | Control | 0.9±0.4     | 1.0±0.4    | 0.366              | 0.064              |
|                 | Currant | 0.9±0.4     | 0.9±0.4    | 0.100              |                    |
| γGT (U/L)       | Control | 32.0±29.3   | 36.0±52.3  | 0.287 <sup>#</sup> | 0.608 <sup>#</sup> |
|                 | Currant | 32.1±34.3   | 34.8±42.0  | 0.856 <sup>#</sup> |                    |
| ALP (U/L)       | Control | 56.6±12.4   | 57.1±13.6  | 0.790              | 0.558              |

|                       |         |               |              |                    |                    |
|-----------------------|---------|---------------|--------------|--------------------|--------------------|
|                       | Currant | 69.8±26.3     | 67.3±25.0    | 0.109              |                    |
| TBIL (mg/dL)          | Control | 0.6±0.4       | 0.7±0.4      | 0.550              | 0.813              |
|                       | Currant | 0.6±0.4       | 0.6±0.4      | 0.971              |                    |
| DBIL (mg/dL)          | Control | 0.2±0.4       | 0.2±0.4      | 0.052              | 0.122              |
|                       | Currant | 0.2±0.4       | 0.2±0.0      | 0.364              |                    |
| HbA <sub>1C</sub> (%) | Control | 5.6±0.14      | 5.4±0.4      | 0.019              | 0.990              |
|                       | Currant | 5.8±0.4       | 5.6±0.4      | <0.001             |                    |
| Insulin (μIU/mL)      | Control | 11.9±3.7      | 11.4±6.2     | 0.689              | 0.030              |
|                       | Currant | 15.5±6.8      | 16.4±8.5     | 0.590              |                    |
| Urea (mg/dL)          | Control | 26.8±7.0      | 32.1±9.1     | 0.012              | 0.871              |
|                       | Currant | 30.3±6.8      | 31.7±7.2     | 0.225              |                    |
| Uric acid (mg/dL)     | Control | 4.7±0.8       | 5.0±1.2      | 0.289              | 0.143              |
|                       | Currant | 4.7±1.3       | 4.6±1.7      | 0.544              |                    |
| CRP (ng/mL)           | Control | 2283.9±2966.8 | 899.9±1180.8 | 0.084 <sup>#</sup> | 0.553              |
|                       | Currant | 2338.9±1720.2 | 872.9±696.6  | 0.002 <sup>#</sup> |                    |
| Visfatin (ng/mL)      | Control | 8.4±2.1       | 5.0±3.3      | 0.031              | 0.112              |
|                       | Currant | 9.1±5.1       | 9.9±3.4      | 0.470              |                    |
| Leptin (ng/mL)        | Control | 68.2±52.0     | 57.7±41.2    | 0.076              | 0.611              |
|                       | Currant | 98.5±76.3     | 78.6±57.7    | 0.036              |                    |
| IL-6 (pg/mL)          | Control | 1.9±3.7       | 1.5±1.7      | 0.136 <sup>#</sup> | 0.035 <sup>#</sup> |
|                       | Currant | 1.3±0.9       | 0.8±0.4      | 0.031 <sup>#</sup> |                    |
| oxLDL (U/L)           | Control | 126.7±28.8    | 114.9±27.6   | 0.080              | 0.270              |
|                       | Currant | 138.0±31.4    | 123.1±37.7   | 0.165              |                    |
| TNF-α (pg/mL)         | Control | 1.3±0.8       | 0.9±0.4      | 0.031              | 0.711              |

|                    |         |              |               |       |       |
|--------------------|---------|--------------|---------------|-------|-------|
|                    | Currant | 0.6±0.4      | 1.2±0.9       | 0.036 |       |
| Serum Oxidiz (sec) | Control | 5861.1±881.7 | 6136.2±1037.4 | 0.153 | 0.248 |
|                    | Currant | 5563.6±760.2 | 5798.4±936.2  | 0.405 |       |

Data are mean values ± standard deviation (SD).

TC, total cholesterol; HDL-C, high-density lipoprotein cholesterol; LDL-C, low-density lipoprotein cholesterol; TG, triglycerides; SGOT, serum glutamic oxalacetic transaminase; SGPT, serum glutamic pyruvic transaminase; SGOT/SGPT, SGOT to SGPT ratio;  $\gamma$ GT,  $\gamma$ -glutamyl transpeptidase; ALP, alkaline phosphatase; TBIL, total bilirubin; DBIL, direct bilirubin; HbA<sub>1C</sub>, glycated hemoglobin; CRP, C-reactive protein; IL-6, interleukin-6; oxLDL, oxidized LDL; TNF- $\alpha$ , tumor necrosis factor  $\alpha$ ; Serum Oxidiz, serum oxidizability

P values: comparison with the baseline values by the paired samples t test # or the Wilcoxon test, Difference was considered significant at  $P < 0.05$ .

\* P values indicate significant differences in change of risk factors in the raisin group as compared with the change in the control group, applying the independent samples t test # or the Mann-Whitney test, Difference was considered significant at  $P < 0.05$ .

**Table 3S. Change in energy and in nutrient intakes in NAFLD patients participating in the Currant or Control arm who regulated their BW after 24-wk in the trial protocol. Nutritional data were derived from food records; MedDiet score is also presented.**

| <b>Variable</b>     | <b>Arm</b> | <b>Week 0</b> | <b>Week 24</b> | <b>P value</b><br>(within group) | <b>* P value</b><br>(between groups) |
|---------------------|------------|---------------|----------------|----------------------------------|--------------------------------------|
| MedDietScore        | Control    | 31.9±4.51     | 34.8±5.4       | 0.015                            | 0.818                                |
|                     | Currant    | 30.1±4.7      | 35.2±5.5       | <0.001                           |                                      |
| Energy (Kcal)       | Control    | 2044.9±538.1  | 1735.0±503.5   | 0.097                            | 0.673                                |
|                     | Currant    | 1898.0±685.2  | 1752.8±653.8   | 0.390                            |                                      |
| Carbohydrates (g)   | Control    | 210.8±67.6    | 193.1±75.8     | 0.403                            | 0.981                                |
|                     | Currant    | 200.1±70.0    | 178.7±61.5     | 0.219                            |                                      |
| Sugars (g)          | Control    | 62.8±23.5     | 64.0±35.0      | 0.900                            | 0.225                                |
|                     | Currant    | 64.2±28.8     | 61.5±27.1      | 0.562                            |                                      |
| Protein (g)         | Control    | 89.4±29.7     | 74.3±23.1      | 0.086                            | 0.085                                |
|                     | Currant    | 76.8±34.3     | 74.8±31.4      | 0.819                            |                                      |
| Fat total (g)       | Control    | 105.2±39.6    | 96.0±23.1      | 0.003                            | 0.305                                |
|                     | Currant    | 87.9±44.9     | 84.9±46.2      | 0.811                            |                                      |
| SFA (g)             | Control    | 30.1±15.7     | 21.7±8.7       | 0.020                            | 0.201                                |
|                     | Currant    | 31.5±13.6     | 21.5±11.9      | 0.008                            |                                      |
| PUFA (g)            | Control    | 15.6±7.4      | 12.6±6.6       | 0.197                            | 0.793                                |
|                     | Currant    | 12.2±9.8      | 13.2±8.9       | 0.696                            |                                      |
| MUFA (g)            | Control    | 47.7±19.8     | 33.2±14.8      | 0.001                            | 0.393                                |
|                     | Currant    | 36.1±24.2     | 42.6±28.0      | 0.366                            |                                      |
| Insoluble fiber (g) | Control    | 2.2±2.9       | 1.1±1.2        | 0.158 <sup>#</sup>               | 0.217                                |

|                 |         |          |         |                    |       |
|-----------------|---------|----------|---------|--------------------|-------|
|                 | Currant | 0.6±0.9  | 0.7±1.4 | 0.594 <sup>#</sup> |       |
| Crude fiber (g) | Control | 2.6±1.7  | 3.9±5.0 | 0.435 <sup>#</sup> | 0.228 |
|                 | Currant | 3.2±4.24 | 4.2±3.4 | 0.184 <sup>#</sup> |       |

Data are mean values ± standard deviation of mean (SD).

SFA, saturated fatty acid; PUFA, polyunsaturated fatty acid; MUFA, monounsaturated fatty acid

P values: comparison with the baseline values by the paired samples t test # or the Wilcoxon test, Difference was considered significant at  $P < 0.05$ .

\* P values indicate significant differences in change of risk factors in the raisin group as compared with the change in the control group, applying the independent samples t test, Difference was considered significant at  $P < 0.05$ .
